# Supplementary material for: Understanding fatigue and recovery mechanisms in Hf0.5Zr0.5O2 capacitors for designing high endurance ferroelectric memory and neuromorphic hardware
Source: Royal Society of Chemistry journal article supplement (doi:10.1039/d4nr04861j), 2025-01-01
Supplement: d4nr04861j1.pdf [file d4nr04861j1.pdf]

## Supporting Information

### Understanding fatigue and recovery mechanism in $\text{Hf}_{0.5}\text{Zr}_{0.5}\text{O}_2$ based thin films capacitors for high endurance ferroelectric memory and neuromorphic hardware

Xinye Li, Padma Srivari, Ella Paasio and Sayani Majumdar \*

X. Li, P. Srivari, E. Paasio, S. Majumdar

Faculty of Information Technology and Communication Sciences, Tampere University, 33720 Tampere, Finland

E-mail: [sayani.majumdar@tuni.fi](mailto:sayani.majumdar@tuni.fi)

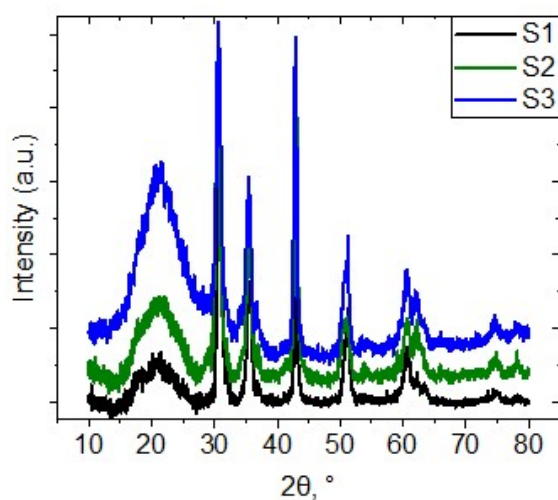

**Figure S1.** Long range scan of  $2\theta$  from  $10^\circ$  to  $80^\circ$  by GIXRD for samples S1, S2 and S3.

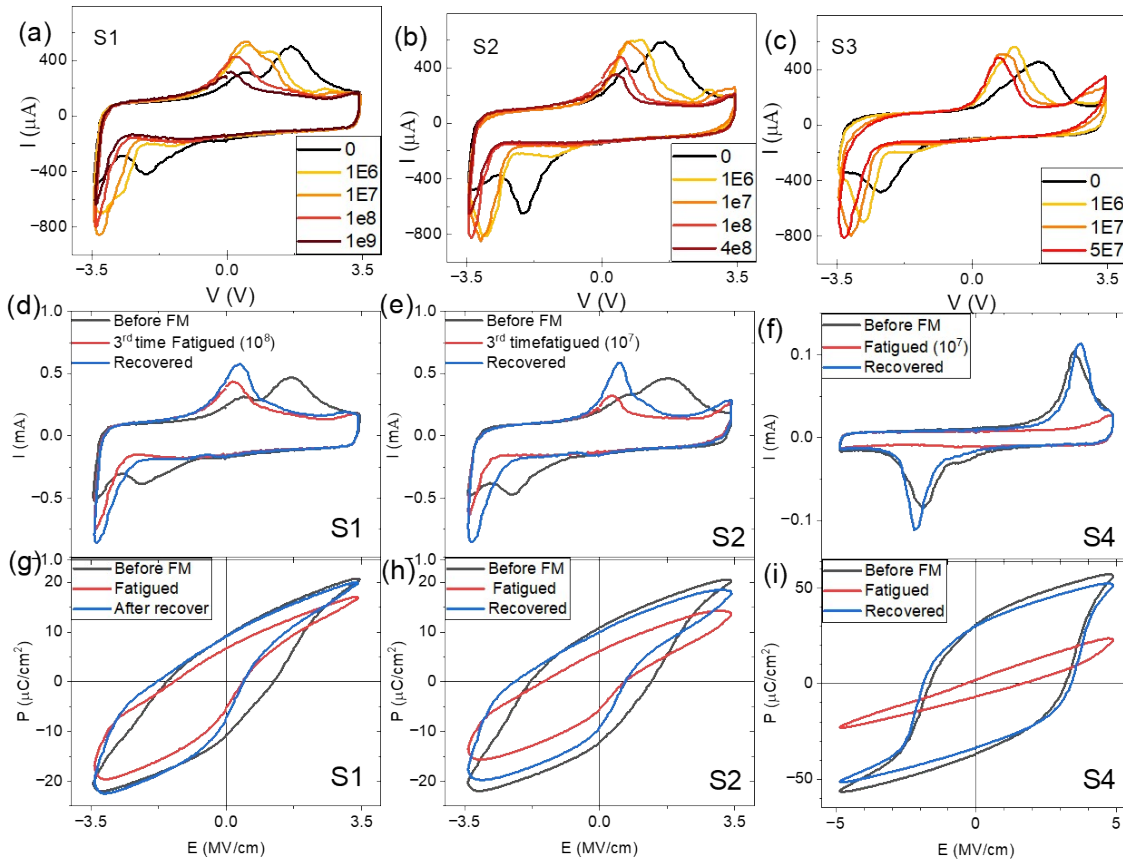

**Figure S2.** DHMs measured before fatigue pulsing cycle (black lines), after certain number of fatigue cycles (orange to red lines) of S1, S2 and S3. (a,b,c) I-V plots; Fatigued and after recovery DHMs (red and blue lines) of S1, S2 and S4 (d,e,f) I-V plots, (g,h,i) are P-E plots.

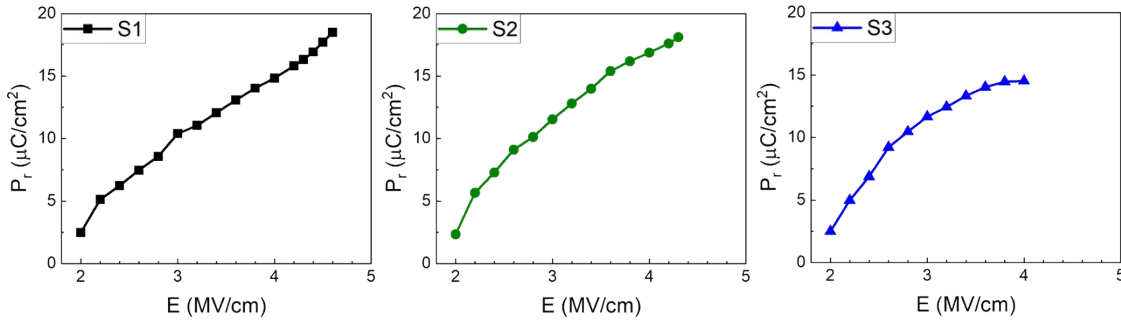

**Figure S3.** Extracted  $P_r$  values from PUND hysteresis plotted in accordance with applied electric field.

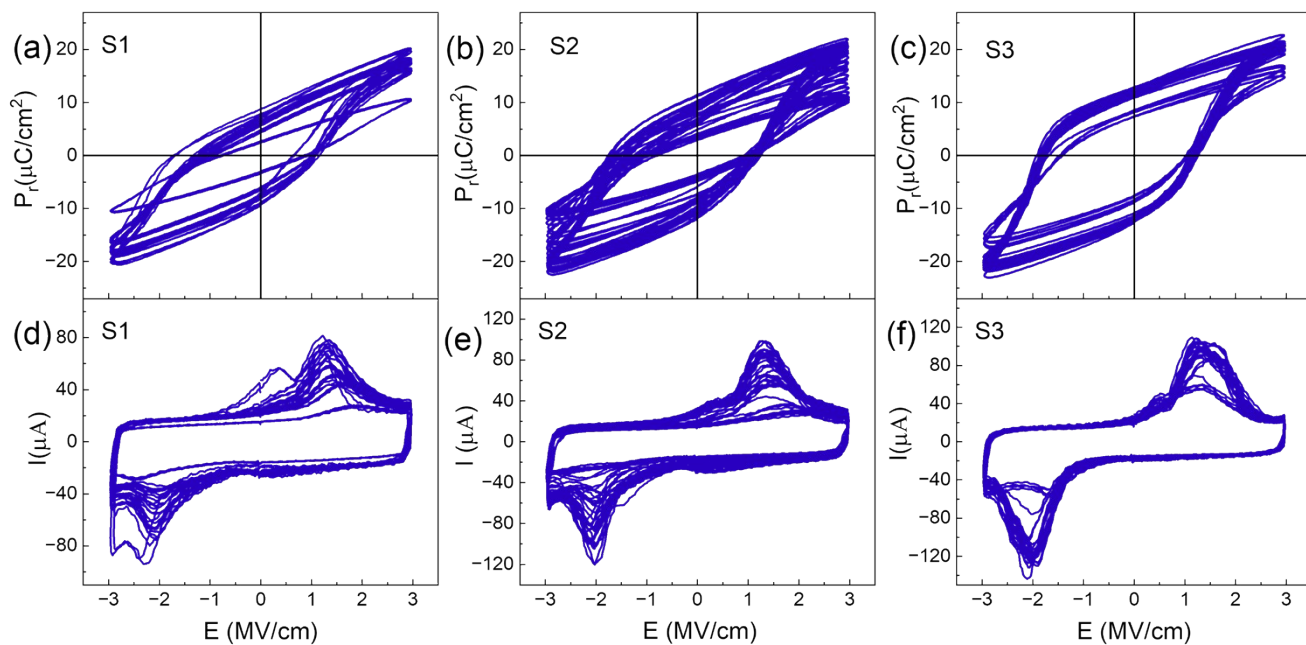

**Figure S4.** DHMs measured from devices at multiple different locations of the wafer from S1, S2 and S3 for a quick comparison.

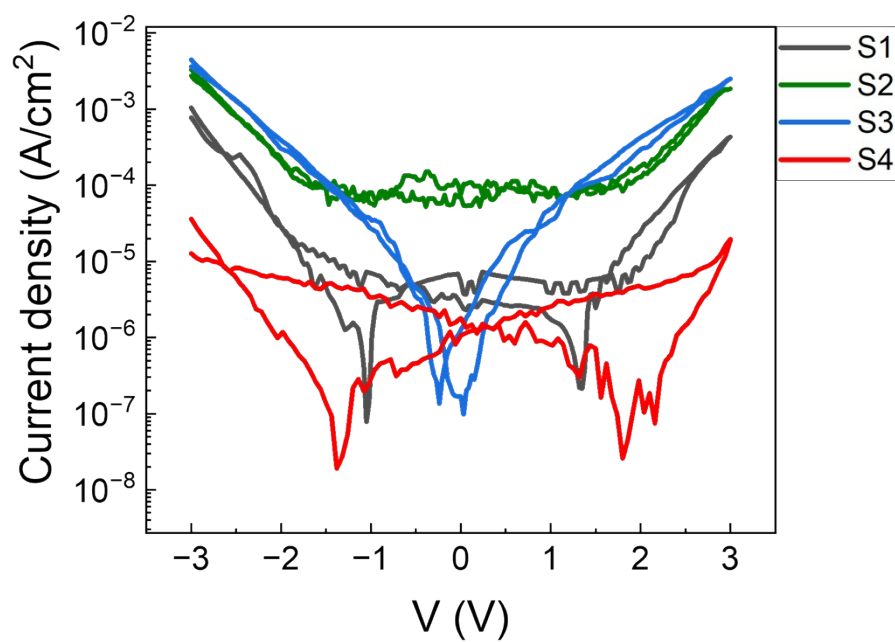

**Figure S5.** Static Current density -Voltage characteristics of samples S1, S2, S3 and S4.
